# Supplementary material for: The Prognostic Role of Right Ventricular Dysfunction in Patients with Hypertrophic Cardiomyopathy
Source: Research Square preprint supplement (doi:10.21203/rs.3.rs-1767675/v1), 2022-06-23
Supplement: Supplementary file 1 [file 0a64cc6e7f829a022fbc43a2.docx]

**STUDY FLOW**

Patient enrollment: January 2011-November 2017

- Unconfirmed HCM/other myocardial diseases n=231
- Poor image quality n=36
- Lack of informed consent and authorization n=12

**607 consecutive patients** with known or suspected HCM

- Lost to follow-up n=13

**328 patients** with HCM

**315 patients** with HCM
